# Supplementary material for: Use of zebrafish larvae lateral line to study protection against cisplatin-induced ototoxicity: A scoping review
Source: PubMed Central journal article supplement — Int J Immunopathol Pharmacol. 2020 Oct 21;34:2058738420959554. doi: 10.1177/2058738420959554 (PMC7786420; doi:10.1177/2058738420959554), 2020-10-21
Supplement: Supplementary.pdf [file Supplementary.pdf]

## Appendix

**Table A1. Zebrafish model in ototoxic assessment (2009-2020). The complete dataset**

| Author s           | Aim of the article                                                                                                | Additional models                                                                                                       | Zebrafish details                                        | Aim of using zebrafish                                                                    | Sample size      | CIS concentration | Tested substances                                                         | Target                | Molecular effect                                                                                                                                                  | Impact on cisplatin efficiency (based on the article )                                | Adversed effects (reported in the article) | Experimental model                                                                                                | Methods dedicated to zebrafish                                  | Results                                                                                                                                                                                             | Conclusion                                                                                                          |
|--------------------|-------------------------------------------------------------------------------------------------------------------|-------------------------------------------------------------------------------------------------------------------------|----------------------------------------------------------|-------------------------------------------------------------------------------------------|------------------|-------------------|---------------------------------------------------------------------------|-----------------------|-------------------------------------------------------------------------------------------------------------------------------------------------------------------|---------------------------------------------------------------------------------------|--------------------------------------------|-------------------------------------------------------------------------------------------------------------------|-----------------------------------------------------------------|-----------------------------------------------------------------------------------------------------------------------------------------------------------------------------------------------------|---------------------------------------------------------------------------------------------------------------------|
| Monroe et al. 2020 | to test if L-serine may reduce cisplatin-mediated ROS generation                                                  | HEI-OC1 cell line (in vitro)                                                                                            | ≥6 mpf AB wild-type zebrafish (utricular tissue culture) | to investigate if cisplatin-mediated ROS generation in zebrafish utricular tissue culture | n= 3-6 (general) | 100 μM            | L-serine (the amino acid tereoisomer)                                     | not applicable        | present and functionally important in many proteins, source of one-carbon groups for the de novo synthesis of purine nucleotides and deoxythymidine monophosphate | L-serine did not alter the effect of cisplatin against the viability of HEI-OC1 cells | not stated                                 | Experimental group: L-serine (100 μM) + CIS (100 μM) for 45 min; L-serine (100 μM) for 45 min; Control group: PBS | spectrophotometry, the fluorescent ROS detector dye (H2DCFDA)   | Combination cisplatin (100 μM) and L-serine (100 μM) treatment causes ROS levels intermediate to cisplatin and L-serine alone and is not statistically different than control.                      | L-serine may act in auditory and vestibular tissues as an effective protectant against cisplatin-mediated toxicity. |
| Gu et al. 2020     | to evaluate the potential antioxidant properties of Astaxanthin                                                   | HEI-OC1 cell line (in vitro), guinea pigs                                                                               | 5 dpf zebrafish (no data)                                | to evaluate the otoprotective role of Astaxanthin in cisplatin-induced hearing loss       | n= 30 per group  | 60 μM             | Astaxanthin (ATX) and ATX in lipid-polymer hybrid nanoparticles (ATX-LPN) | not stated            | scavenging singlet oxygen and free radicals, preventing lipid peroxidation in biological membranes                                                                | not stated                                                                            | not stated                                 | Experimental group: ATX or ATX-LPN (1, 10 and 50 μg/ml) for 4 h then CIS (60 μM) for 24 h; Control group: EM      | Assessment of neuromast hair cell damage (no specific staining) | Both ATX and ATX-LPN at concentrations of 1 and 10 μg/ml did not decrease the damage to hair cells induced by cisplatin. Only at the concentration of 50 μg/ml had a clear protective effect (32%). | ATX-LPN might be as a new therapeutic agent for the prevention of cisplatin-induced ototoxicity.                    |
| Wang et al. 2020   | to examine the role of the sphingosine 1-phosphate receptor 2 (S1P2) in attenuating cisplatin-induced ototoxicity | S1P2 heterozygous mice (S1pr2+/-), Sprague-Dawley rats, cell lines (neural, breast, ovarian, prostate and liver cancer) | 6 dpf zebrafish (no data)                                | to determine if CYM-5478 may be used in zebrafish                                         | n= 24 per group  | no data           | CYM-5478 and NAC (an antioxidant)                                         | S1P2 receptor agonist | cell proliferation, survival, and transcriptional activation                                                                                                      | CYM-5478 did not affect cisplatin effect on tumor cells                               | not stated                                 | Experimental group: CYM-5478 (20 μM) or NAC (1 mM) for 24h; Control group: vehicle                                | Assessment of neuromast hair cell damage (no specific staining) | Hair cell viability was improved by NAC and CYM-5478.                                                                                                                                               | The S1P2 receptor might be a promising therapeutic approach for the treatment of cisplatin-induced ototoxicity.     |

|                   |                                                                                       |                                            |                                          |                                                                              |                |        |                                                                                                                    |                                 |                                                                  |            |            |                                                                                                                                                                                                                                                                                                         |                                                                                |                                                                                                                                                                                                                                                                                          |                                                                                                    |
|-------------------|---------------------------------------------------------------------------------------|--------------------------------------------|------------------------------------------|------------------------------------------------------------------------------|----------------|--------|--------------------------------------------------------------------------------------------------------------------|---------------------------------|------------------------------------------------------------------|------------|------------|---------------------------------------------------------------------------------------------------------------------------------------------------------------------------------------------------------------------------------------------------------------------------------------------------------|--------------------------------------------------------------------------------|------------------------------------------------------------------------------------------------------------------------------------------------------------------------------------------------------------------------------------------------------------------------------------------|----------------------------------------------------------------------------------------------------|
| Zheng et al. 2020 | to assess the antioxidant and anti-apoptosis properties of Salvianolic acid B (Sal B) | HEI-OC1 cell line (in vitro)               | 4 dpf transgenic (Brn3C: EGFP) zebrafish | to investigate the protective effect of Sal B in vivo                        | no data        | 50 µM  | Salvianolic acid B (Sal B)                                                                                         | Multiple pathways <sup>57</sup> | improving the energy metabolism, inhibiting TNF-alpha production | not stated | not stated | Experimental group: Sal B for 2h then CIS (50 µM) + Sal B (40 µM) for 24h; Sal B (40 µM) for 2 h; Control group: DMSO; CIS (50 µM) for 24h                                                                                                                                                              | TUNEL assay, FM1-43 assay (a marker for functional MET channels in hair cells) | Sal B pre-treatment group showed significantly reduced incidents of apoptosis compared those treatments with ototoxin alone. The FM1-43FX-positive cells did not show any significant differences between Sal B and control group.                                                       | Sal B reduces the generation of ROS in response to ototoxin damage.                                |
| Pang et al. 2018  | to explore SIRT1's modulation of autophagy during cisplatin-induced ototoxicity       | HEI-OC1 cell line (in vitro), C57BL/6 mice | 5 dpf transgenic (ET-4) zebrafish        | to confirm the role of autophagy in cisplatin-induced hearing loss (in vivo) | n= 6 per group | 600 µM | Rapamycin (RA, an autophagy activator), SRT1720 (a new synthetic small molecule, the selective activator of SIRT1) | FKBP-12                         | inhibiting autophagy                                             | not stated | not stated | Experimental group: RA (10 µM); RA (10 µM) for 1 h then CIS (600 µM) for 12 or 24h; CIS (600 µM)+ RA (10 µM) for 12 or 24h; SRT1720** (5 µM) for 1h; SRT1720 (5 µM) for 1 h+ CIS (600 µM) for 12 or 24h; CIS (600 µM) + SRT1720 (5 µM) for 12 and 24h; CIS (600 µM) for 12 and 24h; Control group: DMSO | Counting hair cells per 3 neuromast                                            | 12 h after cisplatin treatment, >50% hair cells were eliminated. Pre-treated with RA or SRT1720 reduce the damage. Although at 24 h after cisplatin exposure, nearly all hair cells were eliminated, while pre-treatment with RA or SRT1720 attenuated cisplatin-induced hair cell loss. | SIRT1 can be a potential therapeutic strategy for the treatment of cisplatin-induced hearing loss. |

|                           |                                                                                                                            |                                        |                                                                  |                                                                                                                                 |                   |                |                                                         |                                                                |                                                                             |                                                               |                                                                          |                                                                                                                                                                                                                                                                   |                                                                                                                          |                                                                                                                                                                                                                            |                                                                                                               |
|---------------------------|----------------------------------------------------------------------------------------------------------------------------|----------------------------------------|------------------------------------------------------------------|---------------------------------------------------------------------------------------------------------------------------------|-------------------|----------------|---------------------------------------------------------|----------------------------------------------------------------|-----------------------------------------------------------------------------|---------------------------------------------------------------|--------------------------------------------------------------------------|-------------------------------------------------------------------------------------------------------------------------------------------------------------------------------------------------------------------------------------------------------------------|--------------------------------------------------------------------------------------------------------------------------|----------------------------------------------------------------------------------------------------------------------------------------------------------------------------------------------------------------------------|---------------------------------------------------------------------------------------------------------------|
| Kitcher et al. 2019       | to explore the versatility and mechanisms of protection of ORC-13661 and determine the protective effect against cisplatin | wild-type CD-1 mice (cochlear culture) | 5-7 dpf AB wild-type zebrafish                                   | to assess the protective efficiency in zebrafish                                                                                | n= 9-11 per group | 25-200 $\mu$ M | ORC-13661 (a new drug that was derived from PROTO-1)    | mechanoelectrical transducer (MET) channel in outer hair cells | reducing ototoxic substances entry into hair cells through the MET channels | not stated                                                    | not stated                                                               | Experimental group: CIS (25-200 $\mu$ M) for 24 h + ORC-13661 (0.10-8.33 $\mu$ M)*; Control group: CIS (25-200 $\mu$ M) for 24 h                                                                                                                                  | Counting hair cells (SO1, SO2, O1, and OC1)                                                                              | Cisplatin treatment caused lateral line hair cell loss across all concentrations tested. The HC <sub>50</sub> for protection against 200 $\mu$ M cisplatin was 2.2 $\mu$ M.                                                | ORC-13661 protects against cisplatin toxicity in a dose-dependent manner.                                     |
| Monroe et al. 2019        | to explore if the curcuminoids (CLEFMA and EF24) alter cisplatin efficiency and reduce cisplatin ototoxicity               | lung cancer cell line                  | $\geq$ male and female 6 mpf zebrafish (inner ear)               | to determine if treatment with cisplatin, the curcuminoids, and the cisplatin-curcuminoid combinations alters hearing abilities | n= 6-8 per group  | 25 mg/kg       | CLEFMA, EF24 (curcuminoids)                             | NF- $\kappa$ B and miRNA-21 <sup>58</sup>                      | ROS reduction claim                                                         | curcuminoids are unable to potentiate the effect of cisplatin | not stated                                                               | Experimental group: (microinjection) CIS (25 mg/kg) 24h after CLEFMA or EF24 (5mg/kg); Control group: single injection of CLEFMA (5mg/kg); EF24 (5mg/kg); CIS (25 mg/kg)                                                                                          | ABR (0.1, 0.25, 0.4, 0.8, 1, 1.5 and 3 kHz) 24 and 48h after drug administration                                         | The cisplatin caused a significantly greater threshold shift than the cisplatin-CLEFMA and cisplatin-DMSO treatments (the whole hearing range). Zebrafishes injected only CLEFMA and EF24 had similar auditory thresholds. | AEP results suggests that the curcuminoids may be able to reduce cisplatin-induced auditory threshold shifts. |
| Rocha-Sanchez et al. 2018 | to describe the therapeutic effect of Quinoxaline (Qx) against ototoxic-induced hair cell death                            | -                                      | 5 dpf transgenic Tg(brn3c:GFP) zebrafish and wild-type zebrafish | n.a.                                                                                                                            | n= 20 per group   | 50-800 $\mu$ M | Quinoxaline (Qx, the heterocyclic compound quinoxaline) | various tyrosine kinases <sup>59</sup>                         | not clear                                                                   | not stated                                                    | Protective effect of 150 $\mu$ M Qx depended on the incubation protocol. | Experimental group: Qx (50-300 $\mu$ M) for 2h then CIS (400 $\mu$ M) for 6h; Qx (50-300 $\mu$ M) for 2 h, then 6h (400 $\mu$ M) CIS+ Qx (50-300); Qx (300 $\mu$ M) for 2h+ CIS (50-800 $\mu$ M) +/- Qx for 6 h; CIS (50-800 $\mu$ M) for 6h; Control group: DMSO | Recordings of microphonic potentials, TUNEL assay, proliferation assay, neuromast assessment (IO4, OP1, M2, O1, O2, MI2) | Qx did not block the mechanotransduction channels based on FMI-43 and microphonic potentials. 300 $\mu$ M Qx presented full protection against CIS (50-400 $\mu$ M).                                                       | Animals incubated with Qx are protected against the cisplatin.                                                |

|                     |                                                                                   |   |                                                                           |      |                   |            |                                     |                      |           |                                                               |            |                                                                                                                                                                                             |                                                                                                                                            |                                                                                                                                                                                                                                                                                                                                                                                                                                                           |                                                                                                                                                                                                                                                                                                                                            |
|---------------------|-----------------------------------------------------------------------------------|---|---------------------------------------------------------------------------|------|-------------------|------------|-------------------------------------|----------------------|-----------|---------------------------------------------------------------|------------|---------------------------------------------------------------------------------------------------------------------------------------------------------------------------------------------|--------------------------------------------------------------------------------------------------------------------------------------------|-----------------------------------------------------------------------------------------------------------------------------------------------------------------------------------------------------------------------------------------------------------------------------------------------------------------------------------------------------------------------------------------------------------------------------------------------------------|--------------------------------------------------------------------------------------------------------------------------------------------------------------------------------------------------------------------------------------------------------------------------------------------------------------------------------------------|
| Monroe et al. 2018a | to determine if the platinum(II) complexes caused hearing loss                    | - | ≥6 mpf AB wild-type zebrafish (inner ear)                                 | n.a. | n= 8-15 per group | -          | -                                   | -                    | -         | -                                                             | -          | Experimental group: (microinjection): phenanthriplatin, pyriplatin, Pt(Et2dien)Cl or Pt(dien)Cl (25mg/kg) and an equivalent volume of vehicle (0.9% NaCl); control group: EM                | Hair cell quantification analysis (sacculae and utricle), ABR (0.1, 0.25, 0.4, 0.8, 1, 1.5 and 3 kHz) 24 and 48h after drug administration | Phenanthriplatin treatment produced greater thresholds than cisplatin treatment. At 24 hour post-injection, the compounds did not cause a significant effect on hair cell density in the sacculae. After 48 hours, cisplatin did cause a reduction in hair cell density in three regions along the rostral-caudal axis, and phenanthriplatin reduced hair cell counts. In the utricle, hair cell density was not reduced compared to vehicle 24 and 48 h. | Both complex produced threshold shifts similar to cisplatin, unlike cisplatin, the monofunctional compounds produce virtually no effect on auditory hair cell density. It suggests that these complexes could act in a mechanistically different fashion than cisplatin (possibly through modulation of transcription or protein targets). |
| Monroe et al. 2018b | to test the effects of cisplatin and EF-24 treatment on intracellular ROS release | - | ≥6 mpf AB wild-type zebrafish (saccular and utricular inner ear cultures) | n.a. | n= 3-4 per group  | 100-500 μM | EF-24 (a synthetic curcumin analog) | NF-κB and miRNA-2158 | not clear | curcuminoid is not able to potentiate the effect of cisplatin | not stated | Experimental group: (saccular and utricular tissue cultures) CIS (100-500 μM) for 45 min; EF-24 (100-500 μM); CIS (100-500 μM) for 45 min, after 3h EF-24 (100-500 μM); Control group: DMSO | A fluorescent spectrophotometric assay (18th h of the experiment)                                                                          | Low (100 mM) and high (500 mM) cisplatin caused increased ROS release in both endorgan tissues relative to controls, but both low (100 μM) and high (500 μM) molarity EF-24 treatment either did not alter ROS release or reduced                                                                                                                                                                                                                         | The zebrafish inner ear tissue culture system may be a new technique for assessing novel substances.                                                                                                                                                                                                                                       |

|                   |                                                                                                                                                                           |   |                                                                                                                                               |      |                    |                  |         |                                                                           |                                   |            |                                                                   |                                                                                                                                                                                                   |                                                                                                                                                                                                                                        |                                                                                                                                                                                                                                                                                                                                |                                                                                                                                                                                                                   |
|-------------------|---------------------------------------------------------------------------------------------------------------------------------------------------------------------------|---|-----------------------------------------------------------------------------------------------------------------------------------------------|------|--------------------|------------------|---------|---------------------------------------------------------------------------|-----------------------------------|------------|-------------------------------------------------------------------|---------------------------------------------------------------------------------------------------------------------------------------------------------------------------------------------------|----------------------------------------------------------------------------------------------------------------------------------------------------------------------------------------------------------------------------------------|--------------------------------------------------------------------------------------------------------------------------------------------------------------------------------------------------------------------------------------------------------------------------------------------------------------------------------|-------------------------------------------------------------------------------------------------------------------------------------------------------------------------------------------------------------------|
|                   |                                                                                                                                                                           |   |                                                                                                                                               |      |                    |                  |         |                                                                           |                                   |            |                                                                   |                                                                                                                                                                                                   |                                                                                                                                                                                                                                        | compared to controls.                                                                                                                                                                                                                                                                                                          |                                                                                                                                                                                                                   |
| Vargo et al. 2017 | to investigate the protective role of mdivi-1 against cisplatin toxicity                                                                                                  | - | 5-6 dpf: wild type (Tübingen strain), cdh23 tj264a mutant* and (transgenic pvalb3b:GFP) zebrafish *does not have functional MET in hair cells | n.a. | n= 10-17 per group | 50-200 $\mu$ M   | Mdivi-1 | mitochondrial fission protein Drp1 (dynamin-related GTPase) and dynamin I | changes in mitochondrial function | not stated | High doses of mdivi-1 (>10 $\mu$ M) were toxic to the zebrafishes | Experimental group: CIS (50-200 $\mu$ M) and/or mdivi-1* (1-10 $\mu$ M) for 16 h; Control group: EM                                                                                               | Counting hair cells per neuromast, FM1-43 assay (3-4 neuromasts), recordings of microphonic potentials                                                                                                                                 | Mdivi-1 (3-7 $\mu$ M) protect hair cells against CIS (50 and 100 $\mu$ M). Cisplatin did not affect MET in neuromast hair cells. Microphonic potentials records have been not affected after 100 $\mu$ M cisplatin exposition. 50 $\mu$ M CIS did not change the number of hair cell in neuromasts in mutant but in wild type. | Mitochondria protection prevents cisplatin-induced hair cell death in zebrafish.                                                                                                                                  |
| Todd et al. 2017  | to determine if anatomic recovery results in functional recovery of rheotaxis swimming behavior; to investigate if the created system can detect that functional recovery | - | 5-6 dpf AB wild-type zebrafish                                                                                                                | n.a. | n= 37 (generally)  | 250-1000 $\mu$ M | -       | -                                                                         | -                                 | -          | -                                                                 | Experimental group: CIS (250, 500, 750, or 1000 $\mu$ M) for 4 h, then rinsed 3x in EM; CIS (1000 $\mu$ M) for 4h, then 3x rinsed in EM and raised in EM up to 72h post injury; Control group: EM | Neuromast selection (P3, P4, P5, P6, P7, P8, and P9), rheotaxis assessment (30 min to allow for dark adaptation, next the water flow is turned on and after 1 minute of acclimatization to the flow, recording 2 min of flow behavior) | The high-throughput behavioral assay produces RIs that decrease with higher dosages of cisplatin. Partial recovery of cisplatin-induced anatomic damage is also observed in the partial recovery of behavioral function.                                                                                                       | Automated analysis techniques detect individual zebrafish, compute their orientation, and quantify the rheotaxis behavior of a zebrafish test population, producing a powerful, high-throughput behavioral assay. |

|                     |                                                                                                          |   |                                         |      |                   |                  |                                                                 |                                          |                                                                                                           |            |            |                                                                                                                                                                                            |                                                                                                                                                                                                                                         |                                                                                                                                                                                                                                         |                                                                                                                                                                                                              |
|---------------------|----------------------------------------------------------------------------------------------------------|---|-----------------------------------------|------|-------------------|------------------|-----------------------------------------------------------------|------------------------------------------|-----------------------------------------------------------------------------------------------------------|------------|------------|--------------------------------------------------------------------------------------------------------------------------------------------------------------------------------------------|-----------------------------------------------------------------------------------------------------------------------------------------------------------------------------------------------------------------------------------------|-----------------------------------------------------------------------------------------------------------------------------------------------------------------------------------------------------------------------------------------|--------------------------------------------------------------------------------------------------------------------------------------------------------------------------------------------------------------|
| Kruger et al. 2016  | to screen a natural compound library to find the novel hair cell protectants                             | - | 5 dpf wild-type (Ekkwill) zebrafish     | n.a. | n= 8-15 per group | 500 $\mu$ M      | E6 Berbamine (a synthetic derivative of bisbenzyl isoquinoline) | G-quadruplex DNA, MET channels           | reducing ototoxic substances entry into hair cells through the MET channels                               | not stated | not stated | Experimental group: E6 berbamine (0.25, 0.5, 1, 10 $\mu$ M)+ CIS (500 $\mu$ M) for 6 h, CIS (500 $\mu$ M); Control group: DMSO                                                             | Neuromast assessment (SO1, SO2, IO1-IO4, M2, MI1, MI2 and O2), recordings of microphonic potentials                                                                                                                                     | E6 (1 and 10 $\mu$ M) protected hair cell against cisplatin (500 $\mu$ M).                                                                                                                                                              | E6 barbamine presents otoprotective properties against cisplatin-induced damage by direct interaction with MET channels.                                                                                     |
| Lee et al. 2015     | to evaluate the protective effect of quercetin on cisplatin-induced hearing loss                         | - | 5 dpf transgenic (Brn3C:EGFP) zebrafish | n.a. | n= 10 per group   | 1000 $\mu$ M     | quercetin                                                       | stimulator of SIRT1 and a PI3K inhibitor | inhibiting the production of inflammation-producing enzymes (cyclooxygenase (COX) and lipoxygenase (LOX)) | not stated | not stated | Experimental group: CIS (1 mM) + quercetin (10, 50, 100 and 200 $\mu$ M) for 4 h; CIS (1 mM); Control group: EM                                                                            | Neuromast assessment (SO1, SO2, O1, OC1), TUNEL assay                                                                                                                                                                                   | Hair cell damage was decreased by co-treatment of quercetin and cisplatin (100 $\mu$ M). Apoptosis was decreased by quercetin. The ultrastructure was preserved in zebrafish by the combination of 100 $\mu$ M quercetin and cisplatin. | Quercin shows protective effects against (1 mM) cisplatin-induced toxicity in a zebrafish.                                                                                                                   |
| Niihori et al. 2015 | to create a high-throughput platform for drug development assessing ototoxic and otoprotective compounds | - | 4-5 dpf AB wild-type zebrafish          | n.a. | n= 3-7 per group  | 250-1000 $\mu$ M | Dexamethasone (DEXO)                                            | glucocorticoid receptor                  | changes in gene expression leading to multiple downstream effects                                         | not stated | not stated | Experimental group: CIS (0, 250, 500, 750, or 1000 $\mu$ M) for 4 h, then rinsed 3x in EM; DEXO (5 $\mu$ M) for 12 h + CIS (1000 $\mu$ M) for 4 h, then rinsed 3x in EM; Control group: EM | Neuromast selection (P3, P4, P5, P6, P7, P8, and P9), rheotaxis assessment (30 minutes to allow for dark adaptation, next the water flow is turned on and after 1 min of acclimatization to the flow, recording 2 min of flow behavior) | DEXO pre-exposure partially reduced cisplatin induced damage and rheotaxis index (RI). The system demonstrated a linear correlation between 250 and 1000 $\mu$ M of CIS and rheotactic swimming behavior.                               | The rescue swimming behavior can serve as a biomarker for rescued hair cell function. There is a dose response between cisplatin exposure, progressive hair cell damage, and reduced rheotaxis in zebrafish. |

|                     |                                                                                                                                      |                                          |                                         |                         |                   |                |                                   |                                      |                           |                                                                                                                                                                          |                                                                    |                                                                                                                                                                                                                                                                                                                                                                                                                                                                                                              |                                                                                                             |                                                                                                                                                                                                                                       |                                                                                                                                                                                                                                                                           |
|---------------------|--------------------------------------------------------------------------------------------------------------------------------------|------------------------------------------|-----------------------------------------|-------------------------|-------------------|----------------|-----------------------------------|--------------------------------------|---------------------------|--------------------------------------------------------------------------------------------------------------------------------------------------------------------------|--------------------------------------------------------------------|--------------------------------------------------------------------------------------------------------------------------------------------------------------------------------------------------------------------------------------------------------------------------------------------------------------------------------------------------------------------------------------------------------------------------------------------------------------------------------------------------------------|-------------------------------------------------------------------------------------------------------------|---------------------------------------------------------------------------------------------------------------------------------------------------------------------------------------------------------------------------------------|---------------------------------------------------------------------------------------------------------------------------------------------------------------------------------------------------------------------------------------------------------------------------|
| Thomass et al. 2015 | to screen the ActiProbe 10K library of 10 000 small molecules to identify new protective molecules against cisplatin                 | human lung adenocarcinoma cells, NCI-H23 | 4-5 dpf AB wild-type zebrafish          | to screen new molecules | n= 7-13 per group | 20-200 $\mu$ M | CHCP1 and CHCP2 (small molecules) | not stated                           | not stated                | there was a small reduction in tumor kill with increasing doses of CHCP1 and CHCP2. In addition, both CHCP1 alone and CHCP2 alone caused dose-dependent tumor cell death | CHCP1 above 100 $\mu$ M began to be lethal to the zebrafish larvae | Initial Screen: YO-PRO1, then EM+ 1,5 $\mu$ l of compound for 1 h then co-treated with CIS (50 $\mu$ M) for 24h; Experimental group: pretreated with vehicle only (1.1% DMSO in EM) or the protective compound (50 $\mu$ M); CHCP1 (0-100 $\mu$ M) or CHCP2 (0-100 $\mu$ M) for 1 h; CIS (20, 50, 75, 100, 200 $\mu$ M) + CHCP1 or CHCP2 for 24h; CHCP1 or CHCP2 for 1 h, then, cotreated with 50 $\mu$ M Rho-Pt for 1 h and rinsed in EM, then treated with SYTOX Green Control group: CIS (50 $\mu$ M), EM | Neuromast selection, counting hair cells (SO1, SO2,O1 and OC1), Pho-Pt uptake (Sytox), immunohistochemistry | CHCP1 and CHCP2 caused dose-dependent reduction in cisplatin-induced hair cell death. Pretreatment with CHCP2 (100 $\mu$ M) presented the maximum protection. Treatment with CHCP1, but not CHCP2 reduced hair cell uptake of Rho-Pt. | 2 small molecules (CHCP1 and CHCP2) protect against cisplatin-induced hair cell death. CHCP2 maintained protection over a wider range of cisplatin doses. The protective effects of CHCP1 and CHCP2 are only partially maintained with increased cisplatin concentration. |
| Min et al. 2014     | to investigate whether preconditioning by using Dexmedetomidine (DEX) decreased the occurrence of ischemia in inner cells of the ear | -                                        | 5 dpf transgenic (Brn3C:EGFP) zebrafish | n.a.                    | no data           | 1000 $\mu$ M   | Dexmedetomidine                   | Central alpha-2 Adrenergic receptors | Adrenergic alpha2-Agonist | not stated                                                                                                                                                               | not stated                                                         | Experimental group: DEX (0.1, 1, 10 $\mu$ M) for 150 min, then CIS (1 mM) for 6h; DEX (10 $\mu$ M) + YOH (100 $\mu$ M) for 150 min then CIS (1mM) for 6 h; Control group: EM (control for 8 hours)                                                                                                                                                                                                                                                                                                           | Neuromasts assessment (P1, P2, P3), hair cell counting from P3                                              | Hair cell apoptosis by cisplatin was attenuated more significantly in the DEX preconditioning group than in the control group. The preconditioning effects were not blocked by yohimbine.                                             | Hearing loss caused by vibration-induced noise could be reduced by using DEX. Preconditioning resulted in a reduction of ischaemic damage that was related to short ischaemia                                                                                             |

|                    |                                                                                                        |   |                                                                      |      |                   |          |           |                                                                       |                     |            |            |                                                                                                                                                                                                                                                                                                                                                                                                                                                                              |                                                                                                                                                              |                                                                                                                                                                                                                                                                                                                                            |                                                                                                                                                                                                                                                                                  |                                                 |
|--------------------|--------------------------------------------------------------------------------------------------------|---|----------------------------------------------------------------------|------|-------------------|----------|-----------|-----------------------------------------------------------------------|---------------------|------------|------------|------------------------------------------------------------------------------------------------------------------------------------------------------------------------------------------------------------------------------------------------------------------------------------------------------------------------------------------------------------------------------------------------------------------------------------------------------------------------------|--------------------------------------------------------------------------------------------------------------------------------------------------------------|--------------------------------------------------------------------------------------------------------------------------------------------------------------------------------------------------------------------------------------------------------------------------------------------------------------------------------------------|----------------------------------------------------------------------------------------------------------------------------------------------------------------------------------------------------------------------------------------------------------------------------------|-------------------------------------------------|
|                    |                                                                                                        |   |                                                                      |      |                   |          |           |                                                                       |                     |            |            |                                                                                                                                                                                                                                                                                                                                                                                                                                                                              |                                                                                                                                                              |                                                                                                                                                                                                                                                                                                                                            |                                                                                                                                                                                                                                                                                  | or drug administration prior to long ischaemia. |
| Hong et al. 2013   | to evaluate the effects of Edaravone on cisplatin-induced ototoxicity in transgenic zebrafish          | - | 5 dpf transgenic (Brn3C) zebrafish                                   | n.a. | n= 10 per group   | 1000 µM  | Edaravone | free radicals                                                         | ROS reduction claim | not stated | not stated | Experimental group: CIS (1000 µM) + Edaravone (50, 100, 250, 500, 750, 1000 or 2000 µM) for 4 h, then rinsed 3x in EM; Control group: EM                                                                                                                                                                                                                                                                                                                                     | Neuromasts assessment (SO1, SO2, O1, OC1), TUNEL assay                                                                                                       | Edaravone (750 µM) protected the hair cell against cisplatin-induced (1000 µM) and decreased the TUNEL reaction.                                                                                                                                                                                                                           | Edaravone protects against cisplatin-induced hair cell loss by preventing apoptosis.                                                                                                                                                                                             |                                                 |
| Thomas et al. 2013 | to evaluate the mechanism of cisplatin-induced hair cell death (potential cisplatin uptake modulators) | - | 5 dpf AB wild-type, mariner, sputnik, Tg(pou4f3:gap43-GFP) zebrafish | n.a. | n= 9-12 per group | 0-200 µM | Quinine   | Fe(II)-protoporphyrin IX; platelet glycoprotein IX; potassium channel | not stated          | not stated | not stated | Experimental group: CIS (50-150, 250-500 µM) for 6 and 24 h; CIS (0-200 µM) and/or Rho-Pt for 24 h<br>Cop* (0-0.25 µM) for 20 min, then CIS (50 µM) + Cop for 6 or 24h; CIM** (0-400 µM) for 1 h, then CIS (50 µM) + CIM for 6 or 24h; CIM (400 µM) + Cop (0.05-0.5 µM) + CIS (50 µM) for 24 h; Cop (0.25 µM) + CIM (400 µM) + CIS (100-500 µM) for 6 h; Quinine (10-100 µM) for 1 h, then Quinine + CIS (250-500 µM) for 24h; EGTA or quinine (5 mM) with no calcium for 20 | Hair cell counting (SO1, SO2, O1 and OC1), immunohistochemistry, FM1-43 assay (in 5 neuromasts selected from SO3, O1, OC1, D1, MI2, MI1, O2, OP1, M2 or IO4) | Pretreatment with quinine (100 µM) resulted in significant protection against cisplatin (250 and 500 µM) for 6h. Low concentration copper and/or cimetidine treatment does not prevent cisplatin-induced hair cell death. Increasing concentrations of cimetidine did not significantly protect against cisplatin-induced hair cell death. | Functional mechanotransduction is required for cisplatin-dependent hair cell death. Blockade of mechanotransduction using quinine protects against cisplatin-induced hair cell death. Inhibition of Oct2 and Ctr1 do not significantly affect cisplatin induced hair cell death. |                                                 |



|                   |                                                                                                        |                              |                                                          |                                               |                   |             |                                                                                          |               |                     |                                                                     |                                                                                               |                                                                                                                                                                                                                                                                |                                                                   |                                                                                                                                                                                                                                                                         |                                                                                                                                                      |
|-------------------|--------------------------------------------------------------------------------------------------------|------------------------------|----------------------------------------------------------|-----------------------------------------------|-------------------|-------------|------------------------------------------------------------------------------------------|---------------|---------------------|---------------------------------------------------------------------|-----------------------------------------------------------------------------------------------|----------------------------------------------------------------------------------------------------------------------------------------------------------------------------------------------------------------------------------------------------------------|-------------------------------------------------------------------|-------------------------------------------------------------------------------------------------------------------------------------------------------------------------------------------------------------------------------------------------------------------------|------------------------------------------------------------------------------------------------------------------------------------------------------|
|                   |                                                                                                        |                              |                                                          |                                               |                   |             |                                                                                          |               |                     |                                                                     |                                                                                               | min, then CIS (0-500 µM) or Rho-Pt (50 µM) for 4 h; Control group: EM<br>*to inhibit Ctr1<br>** to inhibit Oct2                                                                                                                                                |                                                                   |                                                                                                                                                                                                                                                                         |                                                                                                                                                      |
| Uribe et al. 2013 | to develop a cisplatin dose-response curve                                                             | -                            | 5 dpf AB wild-type and transgenic (Brn3c mGFP) zebrafish | n.a.                                          | n= 9-16 per group | 250-1000 µM | Dimethyl sulfoxide (DMSO)                                                                | free radicals | reducing ROS claim  | DMSO potentiates the effect of cisplatin                            | Co-treated with DMSO more than >0.01% resulted in killing more hair cell than cisplatin alone | Experimental group: CIS (0.25; 0.50; 0.75; 1.0 and 1.5 mM) co-treated with DMSO (0.001, 0.005, 0.01, 0.05 0.1, 0.5%) + CIS (1 mM) for 4 h; EtOH or MeOH or PEG 400 (0.75%) for 4 h; CIS (1mM) + 0.75% EtOH or 0.75% MeOH or 0.75% PEG 400; Control group: DMSO | Neuromast assessment, hair cell counting in O2                    | Co-treated with DMSO more than >0.01% resulted in killing more hair cell than cisplatin alone. 1 mM CIS noticeably fewer hair cells. PEG 400 (0.75%) were lethal for zebrafish during 4h incubation.                                                                    | DMSO potentiates the effects of cisplatin and killed more sensory hair cells than treatment with cisplatin alone.                                    |
| Shin et al. 2013  | to evaluate the effectiveness of KR-22335 as an otoprotective agent against cisplatin-induced toxicity | HEI-OC1 cell line (in vitro) | 4 dpf AB wild-type zebrafish                             | to confirm the efficiency of KR-22335 in vivo | n= 4-5 per group  | 50 µM       | KR-22335 (a novel synthetic compound, 3-Amino-3-(4-fluorophenyl)-1H-quinoline-2,4-dione) | not stated    | ROS reduction claim | KR-22335 did not interfere with the anti-cancer effect of cisplatin | not stated                                                                                    | Experimental group: KR-22335 (1, 10, 100 µg/ml) for 1 h, then CIS (50 µM) for 24 h; Embryos: CIS (50µM) + KR-22335 (50 or 100µg/ml); Control group: EM                                                                                                         | Neuromasts assessment (SO1, SO2, O1, OC1), TUNEL assay in embryos | Neuromasts from cisplatin-treated larvae showed marked damage to hair cells in neuromasts. Exposure to 50 µM cisplatin for 1 h resulted in severe morphological damages, such as loss or fusion of kinocilium. Cotreatment with KR-22335 reduced cisplatin-induced hair | Cisplatin promotes apoptotic cell death in neuromasts of zebrafish. Cisplatin-induced apoptosis could be inhibited by KR-22335 pretreatment in vivo. |

|                    |                                                                                                                            |   |                                |      |                   |            |                                                   |                                                                 |            |                                                                                                                                                      |                                                                                                                                                                                                                                                                                                                                                                        |                                                                                             |                                                                                                                       |                                                                                                                                                                                                                                                |  |
|--------------------|----------------------------------------------------------------------------------------------------------------------------|---|--------------------------------|------|-------------------|------------|---------------------------------------------------|-----------------------------------------------------------------|------------|------------------------------------------------------------------------------------------------------------------------------------------------------|------------------------------------------------------------------------------------------------------------------------------------------------------------------------------------------------------------------------------------------------------------------------------------------------------------------------------------------------------------------------|---------------------------------------------------------------------------------------------|-----------------------------------------------------------------------------------------------------------------------|------------------------------------------------------------------------------------------------------------------------------------------------------------------------------------------------------------------------------------------------|--|
|                    |                                                                                                                            |   |                                |      |                   |            |                                                   |                                                                 |            |                                                                                                                                                      |                                                                                                                                                                                                                                                                                                                                                                        |                                                                                             |                                                                                                                       | cell loss compared with treatment with cisplatin alone. Exposure to 50 µM cisplatin for 24 h resulted in increased TUNEL positive cells. Co-treatment with KR-22335 reduced TUNEL positive cells compared with treatment with cisplatin alone. |  |
| Coffin et al. 2013 | to investigate cell death pathways activated in response to ototoxic substances such as neomycin, gentamycin and cisplatin | - | 5-6 dpf AB wild-type zebrafish | n.a. | n= 7-12 per group | 250-750 µM | FUT-175, Z-LLF-CHO, 3-MA, D-methionine, leupeptin | FUT-175: reducing eosinophil infiltration, mast cell activation | not stated | Z-LLF-CHO appeared mildly ototoxic during continuous exposure experiments; Z-LLF-CHO and D-methionine presented limited protection against cisplatin | Experimental group: inhibitor (10 µM) for 1h, then CIS (500 µM) for 6h; DMSO for 6h; CIS (500 µM) for 6h, 2x rinsed in EM; inhibitor* (10 µM) for 1h, then CIS (500 µM) + inhibitor for 6h; inhibitor (10 µM) for 1h, then CIS (250-1000 µM) for 6h; cycloheximide (1-100 IM) for 1h then cycloheximide + CIS (250-750 µM) * 61 pharmacological inhibitors were tested | Assessment of 10 head neuromasts, hair cell counting (SO1, SO2, IO1, IO2, IO3, OP1, and M2) | FUT-175, Z-LLF-CHO presented a narrow protection against cisplatin in comparison to 3-MA, D-methionine and leupeptin. | The pattern of protection seen in this cell death inhibitor library screen indicates that there is considerable overlap in the cell death pathways activated by cisplatin.                                                                     |  |

|                         |                                                                                                                                                                                                                                |   |                                                              |      |                 |          |                                                  |                           |                                                               |            |                                                                                                                                                            |                                                                                                                                                                                                                                                                                                          |                                                                          |                                                                                                                                                                                                                                                                                                               |                                                                                                                                                                      |
|-------------------------|--------------------------------------------------------------------------------------------------------------------------------------------------------------------------------------------------------------------------------|---|--------------------------------------------------------------|------|-----------------|----------|--------------------------------------------------|---------------------------|---------------------------------------------------------------|------------|------------------------------------------------------------------------------------------------------------------------------------------------------------|----------------------------------------------------------------------------------------------------------------------------------------------------------------------------------------------------------------------------------------------------------------------------------------------------------|--------------------------------------------------------------------------|---------------------------------------------------------------------------------------------------------------------------------------------------------------------------------------------------------------------------------------------------------------------------------------------------------------|----------------------------------------------------------------------------------------------------------------------------------------------------------------------|
| Mackenzie, Raible, 2012 | to test if hair cell regeneration requires proliferation; to analyze the time of regeneration after treatment with different ototoxin and if proliferative regeneration is the predominant mechanism of hair cell regeneration | - | 3-5 dpf AB wild-type and transgenic Et (krt4:EGFP) zebrafish | n.a. | n= 8 per group  | 50 µM    | Flubendazole (Flu, microtubule assembly blocker) | tubulin                   | stop producing the new hair cells in zebrafish                | not stated | Flubendazole shows a little toxicity to hair cells. Incubating larvae in flubendazole during recovery significantly blocked the addition of new hair cells | Experimental group: CIS (50 µM) for 24 h + Flu* (5µM); Control group: EM, CIS (50µM) for 30 min-10 h                                                                                                                                                                                                     | FM 1-43FX assay (IO1-4, M2, MI1, MI2, O2, SO1, S02), proliferation assay | Regeneration after cisplatin is delayed in comparison to NEO or GEN regeneration until 96 hpt. Incubating larvae in Flu during regeneration significantly blocked the addition of new hair cells. Incubation in Flu preserved a little protection. There was no dose-dependent effect of Flu on regeneration. | Inhibiting proliferation with Flu blocked the production of new hair cells. It indicates that proliferation has a dominant role during regeneration of lateral line. |
| Vlasits et. al. 2012    | to screen of FDA-approved drug library reveals compounds that protect hair cells from cisplatin and determine the optimal concentration of protective compound                                                                 | - | 5-6 dpf AB wild-type zebrafish                               | n.a. | n= >9 per group | 0-100 µM | Benzamil                                         | epithelial sodium channel | inhibits sodium reabsorption in the distal convoluted tubules | not stated | not stated                                                                                                                                                 | Experimental group: 2 YO-PRO1 (2 µM) for 30 min then incubation in one of the library compounds (4 µg/ml) for 1 h and then + CIS (50 µM) for 24h; protective compounds (0, 0.5, 1, 5, 10, 50 µM) + CIS; CIS (0-100 µM) + benzamil (0, 5, 10, 25, 50, 100 µM) for 24h; Control group: CIS (50 µM) for 24h | Assessment of 10 neuromasts (IO 1-4, SO1-2, M2, MI1-2, O2)               | Benzamil protected hair cells from cisplatin-induced hearing loss in zebrafish.                                                                                                                                                                                                                               | The protective compounds should be developed in studies in mammals.                                                                                                  |

|                    |                                                                                                                    |               |                                        |                                 |                   |         |          |                                                                     |               |            |            |                                                                                                                                                                                    |                                                     |                                                                                                                                                              |                                                                                                                                   |
|--------------------|--------------------------------------------------------------------------------------------------------------------|---------------|----------------------------------------|---------------------------------|-------------------|---------|----------|---------------------------------------------------------------------|---------------|------------|------------|------------------------------------------------------------------------------------------------------------------------------------------------------------------------------------|-----------------------------------------------------|--------------------------------------------------------------------------------------------------------------------------------------------------------------|-----------------------------------------------------------------------------------------------------------------------------------|
| Hirose et al. 2011 | to screen a library of 88 anti-cancer drugs to identify drugs that damage hair cells of the zebrafish lateral line | -             | 5 dpf AB wild-type zebrafish           | n.a.                            | n= 7-10 per group | 50 µM   | -        | -                                                                   | -             | -          | -          | Experimental group: potential drug (0, 10, 50, 100, 200 and 400 µM) for 1 or 6 h; CIS (50 µM) + Dox or Vinc or Vno (1-100 µM) or 5-Fu (1-50 µM) for 6h; Control group: EM (150 µL) | Hair cell counting (SO1, SO2, O1 and OC1)           | Carboplatin was not detected as a toxic. Anti-cancer drugs vincristine (Vinc), vinorelbine (Vino), doxorubicin (Dox) presented synergistic ototoxic effects. | Combination doses of drugs that individually causes no hair cell loss could cause significant hair cell death when used together. |
| Choi et al. 2011   | to investigate the protective effects of apocynin on cisplatin-induced hair cell death                             | HEI-OC1 cells | 5 dpf transgenic (Bm3C:EGFP) zebrafish | to study the effect of apocynin | n= 4 per group    | 1000 µM | Apocynin | nicotinamide adenine dinucleotide phosphate oxidase (NADPH oxidase) | ROS reduction | not stated | not stated | Experimental group: CIS (1 mM)+ apocynin (125,250,500 and 1000 µM) for 6h, THEN 3x rinsed in EM; Control group: apocynin (125,250,500 and 1000 µM)                                 | Hair cell counting (SO1, SO2, O1, OC1), TUNEL assay | Apocynin decreased the TUNEL reaction and prevent cisplatin-induced hair cell loss at the neuromasts at low concentration (125-250 µM).                      | Apocynin prevents cisplatin induced apoptotic cell death.                                                                         |

**Abbreviations:** CIS, cisplatin; RA, Rapamycin; SIRT1, Sirtuin 1; Qx, quinoxaline; COP, copper; dpf, days post-fertilization; mpf, months post-fertilization; GM, gentamicin; NM, neomycin; OPC, optimally protective concentration; h, hour; EM, embryo media; TL, total length; min, minutes; RI, Rheotaxis index; FF, fenofibrate; SnPPIX, tin protoporphyrin IX; TBBPA, tetrabromobisphenol-A; ROS, reactive oxygen species; DMSO, vehicle dimethyl sulfoxide; Rho-Pt, rhodamine-conjugated platinum reagent; HGF, hepatocyte growth factor; dexmedetomidine, DEX; YOH, yohimbine; N-acetylcysteine, NAC; Texas red-conjugated Neomycin, NRT; CIM, cimetidine; Flu, F
